# Supplementary material for: A highly selective and sensitive fluorescent nanosensor for dopamine based on formate bridged Tb(iii) complex and silver nanoparticles
Source: Royal Society of Chemistry journal article supplement (doi:10.1039/c7an00961e), 2017-01-01
Supplement: c7an00961e1.pdf [file c7an00961e1.pdf]

# Supplementary Information

## **A highly selective and sensitive fluorescent nanosensor for dopamine based on formate bridged Tb(III) complex and silver nanoparticles**

Huihui Li,<sup>‡a</sup> Jin Shen,<sup>‡a</sup> Rongwei Cui,<sup>a</sup> Chongmei Sun,<sup>a</sup> Yanyan Zhao,<sup>a</sup> Xia Wu,<sup>\*a</sup> Na Li,<sup>b</sup>  
and Bo Tang<sup>\*b</sup>

<sup>a</sup> School of Chemistry and Chemical Engineering, Shandong University, Key Laboratory of Colloid and Interface Chemistry (Shandong University), Ministry of Education, Jinan 250100, PR China

<sup>b</sup> College of Chemistry, Chemical Engineering and Materials Science, Collaborative Innovation Center of Functionalized Probes for Chemical Imaging in Universities of Shandong, Shandong Normal University, Jinan 250014, PR China

Corresponding Authors

\*E-mail: wux@sdu.edu.cn

\*E-mail: tangb@sdsu.edu.cn.

Tel./ Fax: +86-531-88564464, +86-531-86180017.

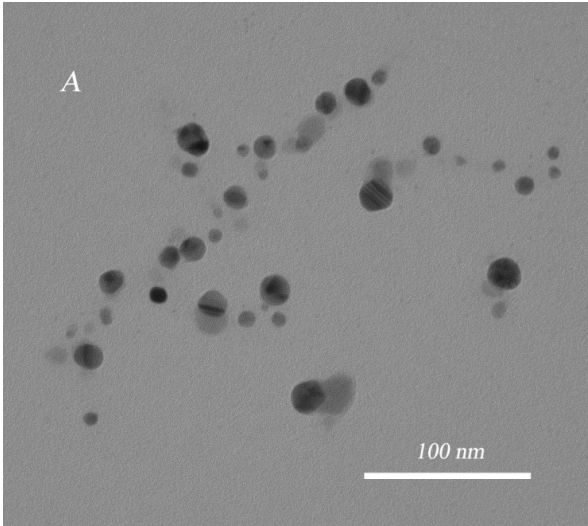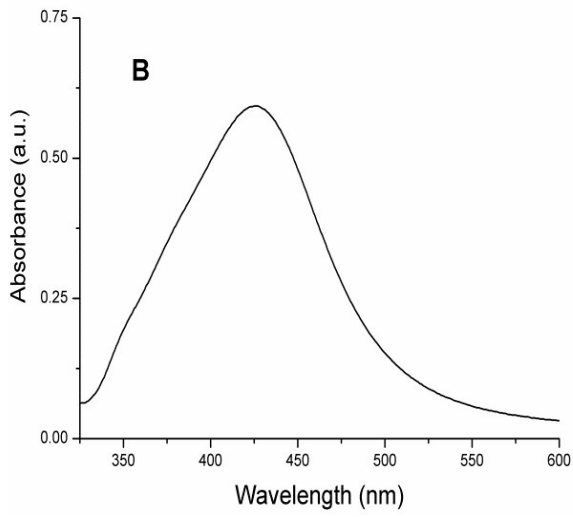

**Figure S1.** TEM image (A) and UV-Vis spectrum (B) of AgNPs.

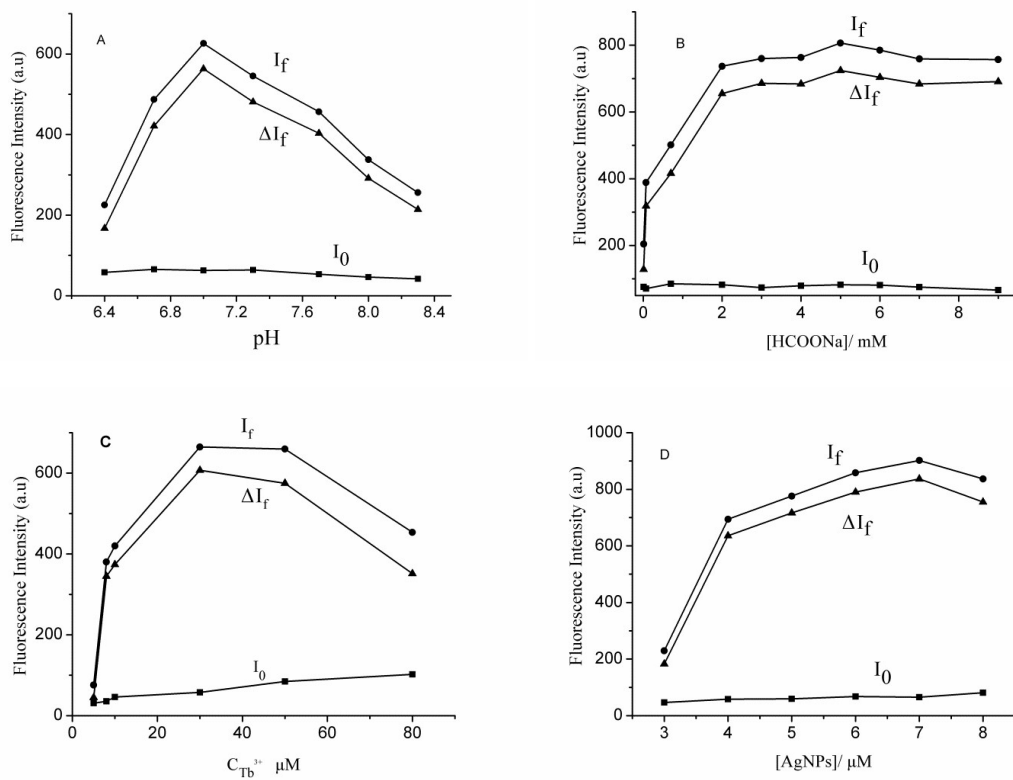

**Figure S2.** Effects of pH (A), HCOONa (B),  $Tb^{3+}$  (C) and AgNPs (D) on fluorescence intensities.

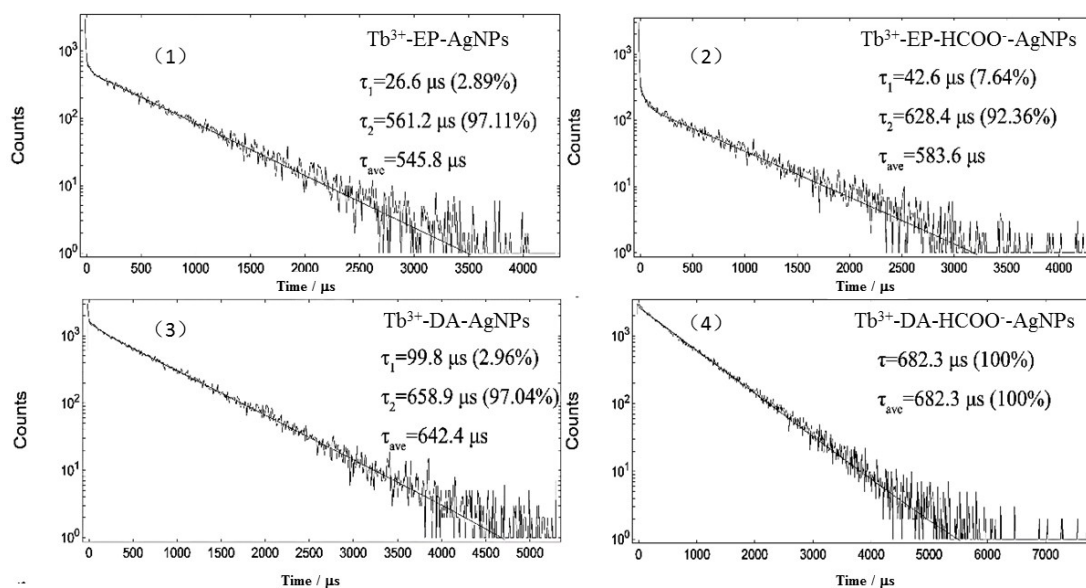

**Figure S3.** Fluorescence lifetime decay curves of (1)  $\text{Tb}^{3+}$ -EP-AgNPs, (2)  $\text{Tb}^{3+}$ - EP-HCOO<sup>-</sup>-AgNPs, (3)  $\text{Tb}^{3+}$ -DA-AgNPs, (4)  $\text{Tb}^{3+}$ - DA-HCOO<sup>-</sup>-AgNPs. Experimental conditions: 30  $\mu\text{M}$   $\text{Tb}^{3+}$ , 7.0  $\mu\text{M}$  AgNPs, 5.0 mM HCOO<sup>-</sup>, 10  $\mu\text{M}$  EP and DA for Abs and 0.10  $\mu\text{M}$  DA for FL in 0.01 M, HEPES-NaOH, pH =7.00 buffer solutions

**Table S1.** Comparison of the detection limit of DA with other proposed analytical methods

| Sensing material                  | Detection method         | Linear range              | LOD <sup>a</sup> (nM) | Refs      |
|-----------------------------------|--------------------------|---------------------------|-----------------------|-----------|
| Ag <sup>+</sup> -TMB <sup>b</sup> | Colorimetry              | 0.1 -1.0 μM, 1.0 -20.0 μM | 50                    | (1)       |
| AuNPs/CPE <sup>c</sup>            | Electrochemical          | 0.1 -25 μM                | 24                    | (2)       |
| CdSe QDs <sup>d</sup>             | Electrochemiluminescence | 0.010 -3.0 μM             | 3.0                   | (3)       |
| FB-AuNPs/NsNHS-AuNPs <sup>e</sup> | Absorbance               | 5 -100 nM                 | 1.2                   | (4)       |
|                                   | Fluorescence             | 5 -100 nM                 | 2.9                   | (4)       |
| N-GQDs <sup>f</sup>               | Fluorescence             | 1 -200 μM,                | 70                    | (5)       |
| Conjugated polymer nanoparticles  | Fluorescence             | 0.025 -10 μM              | 38.8                  | (6)       |
| Polydopamine nanoparticles        | Fluorescence             | 0.1 -20 μM                | 40                    | (7)       |
| SiNP <sup>g</sup>                 | Fluorescence             | 0.005 -10.0 μM,           | 0.3                   | (8)       |
| This method                       | Fluorescence             | 0.5 -100 nM               | 0.15                  | This work |

<sup>a</sup> Limit of determination ; <sup>b</sup> 3,3',5,5'-tetramethylbenzidine

<sup>c</sup> Gold nanoparticles chemically modified carbon paste electrode;

<sup>d</sup> Mercaptopropionic acid and modium hexametaphosphate dual-stabilizers-capped CdSe quantum dots;

<sup>e</sup> Fluorescein modified gold nanoparticles and Nile blue modified gold nanoparticles;

<sup>f</sup> Nitrogen-doped graphene quantum dots; <sup>g</sup> water-soluble silicon nanoparticle with rich amidogens

#### References

- 1 S. Zhu, J. Yang, X.-e. Zhao, R. Kong, H. Wang and J. You, *Anal. Methods*, 2015, **7**, 6785-6790.
- 2 N. Baig and A. N. Kawde, *Rsc Adv.*, 2016, **6**, 80756-80765.
- 3 S. F. Liu, X. Zhang, Y. M. Yu and G. Z. Zou, *Anal. Chem.*, 2014, **86**, 2784-2788.
- 4 Z. H. Zeng, B. Cui, Y. Wang, C. J. Sun, X. Zhao and H. X. Cui, *ACS Appl. Mater. Interface*, 2015, **7**, 16518-16524.
- 5 X. Chen, N. zheng, S. Chen and Q. Ma, *Anal. Methods*, 2017, **9**, 2246-2251.
- 6 C. G. Qian, S. Zhu, P. J. Feng, Y. L. Chen, J. C. Yu, X. Tang, Y. Liu and Q. D. Shen, *ACS Appl. Mater. Interface*, 2015, **7**, 18581-18589.
- 7 A. Yildirim and M. Bayindir, *Anal. Chem.*, 2014, **86**, 5508-5512.
- 8 X. D. Zhang, X. K. Chen, S. Q. Kai, H. Y. Wang, J. J. Yang, F. G. Wu and Z. Chen, *Anal. Chem.*, 2015, **87**, 3360-3365.
